# Supplementary material
Source: Royal Society of Chemistry journal article supplement (doi:10.1039/d6ma00202a)
Supplement: d6ma00202a1.pdf [file d6ma00202a1.pdf]

## Supplementary Information

# Hydrophobic Block-Structured PDMS/Pt-mesoporous silica Catalysts for Sustainable Water-Hydrogen Isotope Exchange

**Daeuk Kang<sup>a,b</sup>, Huiryung Heo<sup>c</sup>, Euna Jeong<sup>d</sup>, Hee-Man Yang<sup>a,b</sup>, Dong-Yeun Koh<sup>c</sup>, Chan Woo Park<sup>\*b</sup>, Hyung-Ju Kim<sup>\*a,b</sup>**

<sup>a</sup>Nuclear Science and Technology, University of Science and Technology, 217 Gajeong-ro, Yuseong-gu, Daejeon 34113, Republic of Korea

<sup>b</sup>Nuclear Facility Cleanup Technology Division, Korea Atomic Energy Research Institute, 989-111 Daedeok-daero, Yuseong-gu, Daejeon 34057, Republic of Korea

<sup>c</sup>Department of Chemical and Biomolecular Engineering, Korea Advanced Institute of Science and Technology, 291, Daehak-ro, Yuseong-gu, Daejeon, 34141, Republic of Korea

<sup>d</sup>Radioactive Waste Technology Team, Korea Research Institute of Decommissioning, 569, Haemaji-ro, Jangan-eup, Gijang-gun, Busan, 46035, Republic of Korea

<sup>e</sup>Department of Chemical and Biomolecular Engineering, Korea Advanced Institute of Science and Technology, 291, Daehak-ro, Yuseong-gu, Daejeon, 34141, Republic of Korea

### Correspondence

H. J. Kim. E-mail: [hyungjukim@kaeri.re.kr](mailto:hyungjukim@kaeri.re.kr)

C.W. Park, E-mail: [chanwoo@kaeri.re.kr](mailto:chanwoo@kaeri.re.kr)

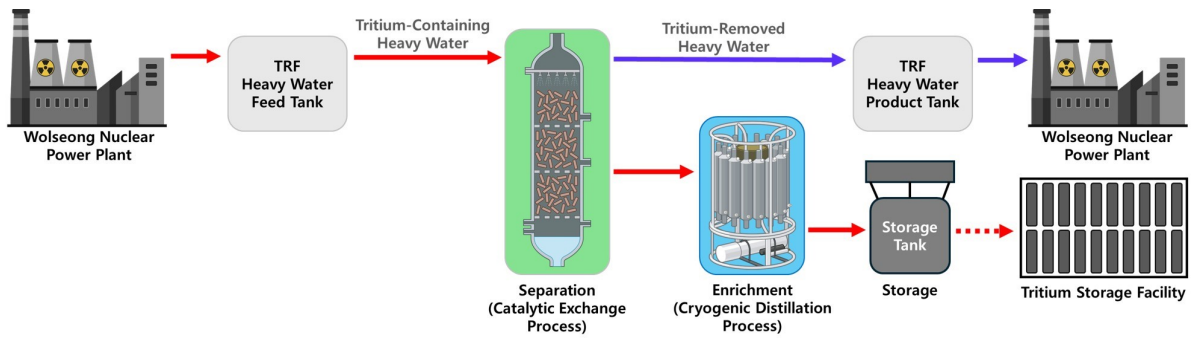

**Fig. S1** The scheme of the Tritium Removal Facility at Wolsong nuclear power plant.

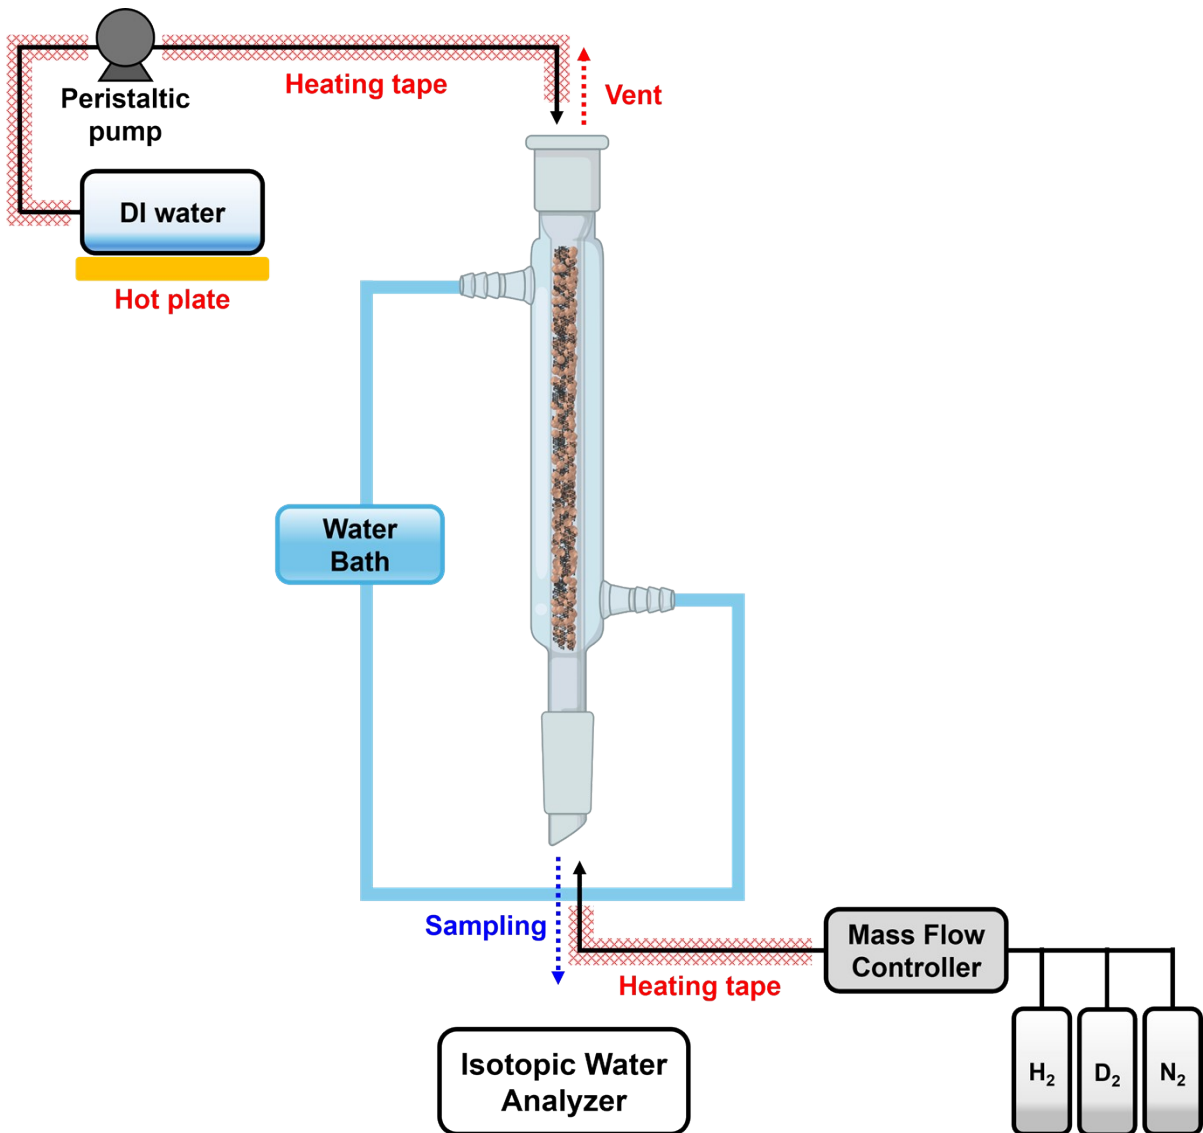

**Fig. S2** The schematic diagram of the lab made experimental setup for the LPCE process.

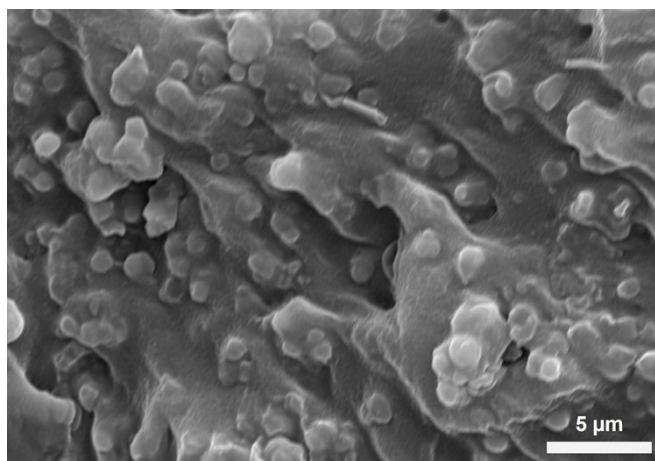

**Fig. S3** Cross-sectional SEM image of Pt@SiO<sub>2</sub>-PDMS.

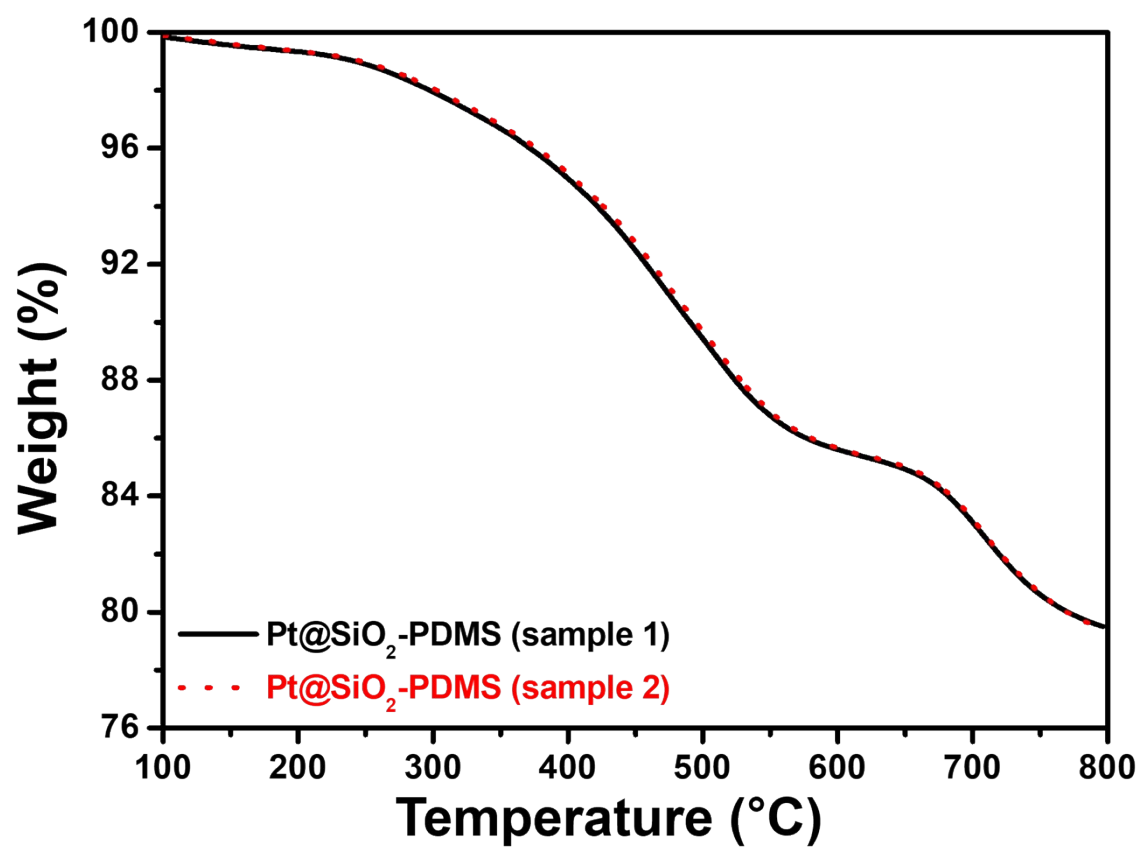

**Fig. S4** TGA curves of Pt@SiO<sub>2</sub>-PDMS sample by sample from different batch.

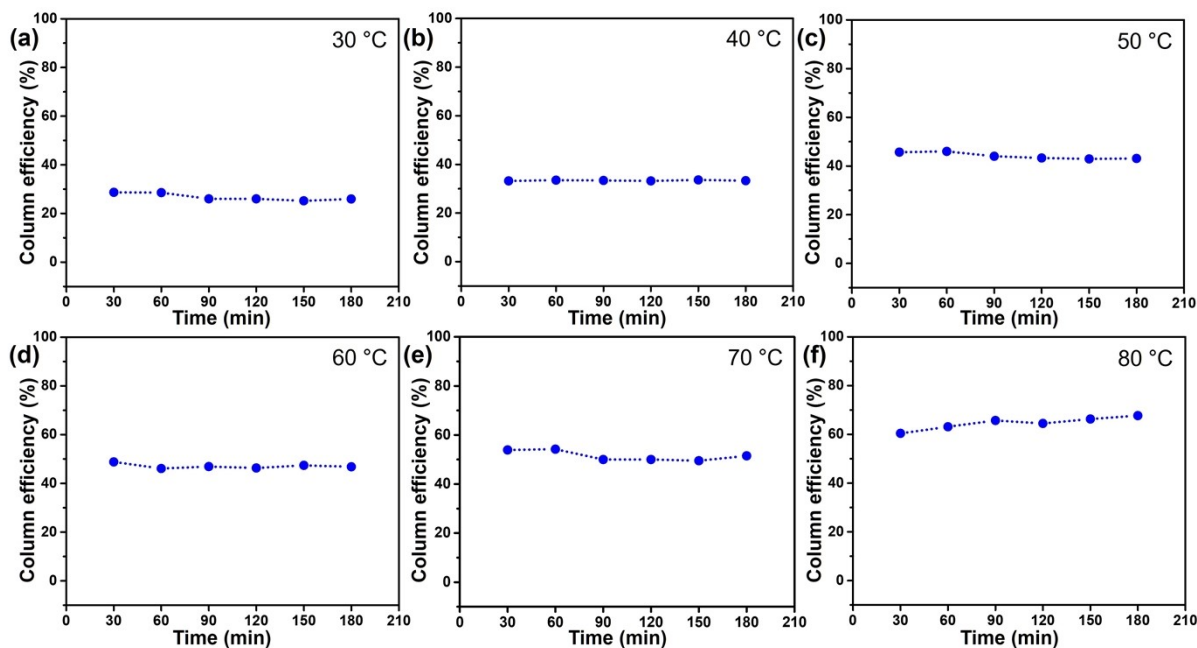

**Fig. S5** Column efficiency (%) of the Pt@SiO<sub>2</sub>-PDMS randomly packed with Dixon rings in a volume ratio of 2:1 measured at temperatures of (a) 30, (b) 40, (c) 50, (d) 60, (e) 70 and (f) 80 °C.

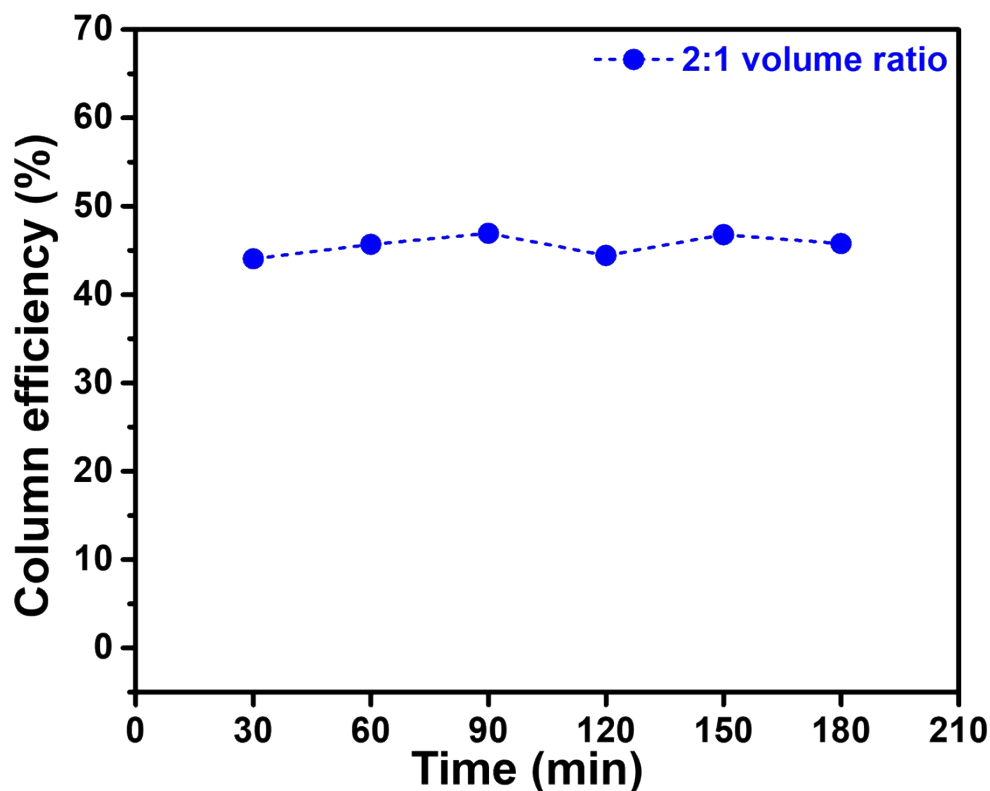

**Fig. S6** Column efficiency (%) of the Pt@SiO<sub>2</sub>-PDMS randomly packed with Dixon rings in a volume ratio of 2:1 measured every 30 min interval over 180 min at 60 °C. The column containing catalyst and Dixon rings was stored in a 65 °C oven overnight for regeneration after 14 days of LPCE operation in Fig. 11.

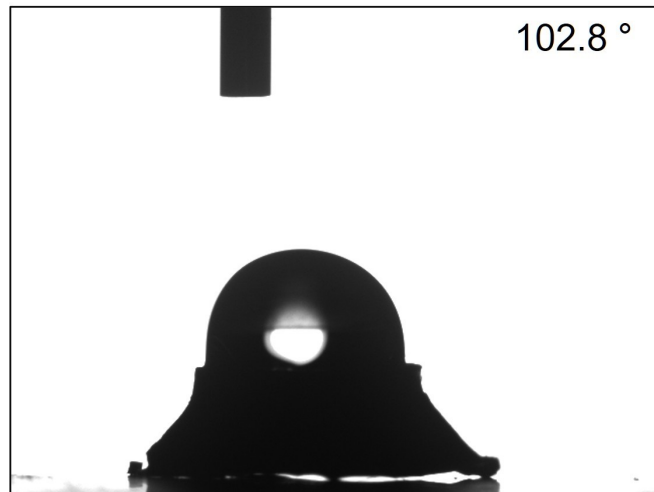

**Fig. S7** The WCA of Pt@SiO<sub>2</sub>-PDMS measured after the long-term LPCE test.

**Table S1** Column efficiency (%) of PDMS, SiO<sub>2</sub>-PDMS and Pt@SiO<sub>2</sub>-PDMS randomly packed with Dixon rings in a volume ratio of 1:4 measured every 30 min interval over 180 min at 60 °C.

| Time (min) | PDMS              | SiO <sub>2</sub> -PDMS | Pt@SiO <sub>2</sub> -PDMS |
|------------|-------------------|------------------------|---------------------------|
| 30         | -0.3 <sup>a</sup> | 0                      | 21.4                      |
| 60         | 0                 | 0.2                    | 21.3                      |
| 90         | -0.1 <sup>a</sup> | 0.5                    | 23.0                      |
| 120        | 0                 | -0.2 <sup>a</sup>      | 22.6                      |
| 150        | 0.2               | -0.4 <sup>a</sup>      | 22.5                      |
| 180        | 0.1               | -0.3 <sup>a</sup>      | 19.3                      |

<sup>a</sup>negative value indicates the mass transfer in the wrong direction, thereby D transfers opposite to what equilibrium predicts.

**Table S2** Column efficiency (%) of the Pt@SiO<sub>2</sub>-PDMS randomly packed with Dixon rings in a volume ratio of 1:4, 1:1 and 2:1 measured every 30 min interval over 180 min at 60 °C.

| Time (min) | 1:4<br>volume ratio | 1:1<br>volume ratio | 2:1<br>volume ratio |
|------------|---------------------|---------------------|---------------------|
| 30         | 21.4                | 35.5                | 46.1                |
| 60         | 21.3                | 37.7                | 46.9                |
| 90         | 23.0                | 36.2                | 46.3                |
| 120        | 22.6                | 37.1                | 47.4                |
| 150        | 22.5                | 36.6                | 46.8                |
| 180        | 19.3                | 35.5                | 47.0                |

**Table S3** Column efficiency (%) of the Pt@SiO<sub>2</sub>-PDMS randomly packed with Dixon rings in a volume ratio of 2:1 measured every 30 min interval over 180 min under temperate ranging from 30 to 80 °C.

| Time (min) | 30 °C       | 40 °C       | 50 °C       | 60 °C       | 70 °C       | 80 °C       |
|------------|-------------|-------------|-------------|-------------|-------------|-------------|
| 30         | 28.0        | 33.2        | 45.7        | <b>48.8</b> | 53.9        | 60.4        |
| 60         | <b>28.7</b> | 33.5        | <b>46.0</b> | 46.1        | <b>54.2</b> | 63.1        |
| 90         | 28.6        | 33.4        | 44.0        | 46.9        | 50.0        | 65.7        |
| 120        | 26.0        | 33.2        | 43.3        | 46.3        | 50.0        | 64.5        |
| 150        | 26.0        | <b>33.6</b> | 42.9        | 47.4        | 49.5        | 66.3        |
| 180        | 25.2        | 33.3        | 43.1        | 46.8        | 51.5        | <b>67.7</b> |

**Table S4** Column efficiency (%) of the Pt@SiO<sub>2</sub>-PDMS randomly packed with Dixon rings in a volume ratio of 2:1 measured for 14 days at 80 °C.

| Time (min) | Column efficiency (%) | Time (day) | Column efficiency (%) | Time (day) | Column efficiency (%) |
|------------|-----------------------|------------|-----------------------|------------|-----------------------|
| 15         | 60.4                  | 1          | 62.6                  | 11         | 63.6                  |
| 30         | 63.1                  | 2          | 65.3                  | 12         | 69.3                  |
| 60         | 65.7                  | 3          | 68.7                  | 13         | 63.3                  |
| 90         | 64.5                  | 4          | 64.4                  | 14         | 64.6                  |
| 120        | 66.3                  | 5          | 64.0                  |            |                       |
| 150        | 67.7                  | 6          | 66.9                  |            |                       |
| 180        | 67.0                  | 7          | 66.7                  |            |                       |
| 360        | 60.4                  | 8          | 65.0                  |            | -                     |
| 720        | 62.9                  | 9          | 62.7                  |            |                       |
| 1080       | 64.6                  | 10         | 67.4                  |            |                       |

**Table S5** Column efficiency (%) of the Pt@SiO<sub>2</sub>-PDMS randomly packed with Dixon rings in a volume ratio of 2:1 measured every 30 min interval over 180 min at 60 °C for recyclability test after 14 days of LPCE operation and subsequent regeneration.

| Time (min) | Column efficiency (%) |
|------------|-----------------------|
| 30         | 44.0                  |
| 60         | 45.7                  |
| 90         | 46.9                  |
| 120        | 44.4                  |
| 150        | 46.8                  |
| 180        | 45.8                  |

**Table S6** H<sub>2</sub> chemisorption results of Pt@SiO<sub>2</sub>-PDMS after the long-term LPCE test.

| Metal dispersion (%) | Metallic surface area (m <sup>2</sup> g <sup>-1</sup> metal) | Particle size (nm) |
|----------------------|--------------------------------------------------------------|--------------------|
| 3.1                  | 7.6                                                          | 36.7               |
